# Supplementary material for: New Preparative Approach to Purer Technetium-99 Samples—Tetramethylammonium Pertechnetate: Deep Understanding and Application of Crystal Structure, Solubility, and Its Conversion to Technetium Zero Valent Matrix
Source: MDPI journal article supplement (doi:10.3390/ijms24032015), 2023-01-19
Supplement: s1 [file s1]

# New preparative approach to purer technetium-99 samples. Tetramethylammonium pertechnetate: deep understanding and application of crystal structure, solubility, and its conversion to technetium zero valent matrix

Mikhail A. Volkov<sup>1\*</sup>, Anton P. Novikov<sup>1,2</sup>, Mikhail S. Grigoriev<sup>1</sup>, Vitaly V. Kuznetsov<sup>1,3</sup>, Anastasiia V. Sitanskaya<sup>1</sup>, Elena V. Belova<sup>1</sup>, Andrew V. Afanasiev<sup>1</sup>, Yuri M. Nevolin<sup>1</sup>, Konstantin E. German<sup>1</sup>

<sup>1</sup> Frumkin Institute of Physical Chemistry and Electrochemistry, Russian Academy of Sciences, 31 Bldg 4, Leninsky prosp., Moscow, 119071, Russian Federation

<sup>2</sup> Peoples' Friendship University of Russia (RUDN University), 6 Miklukho-Maklaya Street, Moscow, 117198, Russian Federation

<sup>3</sup> Mendeleev University of Chemical Technology, 9 Miusskaya Square, Moscow, 125047, Russian Federation

\* Correspondence: mikhailalexvol@gmail.com

**Table S1.** Bond Lengths for **1**.

| Atom | Atom            | Length/Å |  | Atom | Atom            | Length/Å |
|------|-----------------|----------|--|------|-----------------|----------|
| Tc1  | O1              | 1.665(3) |  | N1   | C1 <sup>2</sup> | 1.479(3) |
| Tc1  | O1 <sup>1</sup> | 1.665(3) |  | N1   | C1              | 1.479(3) |
| Tc1  | O2              | 1.689(4) |  | N1   | C2 <sup>2</sup> | 1.481(3) |
| Tc1  | O3              | 1.693(4) |  | N1   | C2              | 1.481(3) |

<sup>1</sup>+X,+Y,3/2-Z; <sup>2</sup>+X,1/2-Y,1-Z

**Table S2.** Bond Angles for **1**.

| Atom            | Atom | Atom            | Angle/°    |  | Atom            | Atom | Atom            | Angle/°  |
|-----------------|------|-----------------|------------|--|-----------------|------|-----------------|----------|
| O1              | Tc1  | O1 <sup>1</sup> | 114.1(4)   |  | C1 <sup>2</sup> | N1   | C1              | 110.3(3) |
| O1              | Tc1  | O2              | 107.1(2)   |  | C1 <sup>2</sup> | N1   | C2              | 109.3(2) |
| O1 <sup>1</sup> | Tc1  | O2              | 107.1(2)   |  | C1              | N1   | C2              | 108.7(2) |
| O1              | Tc1  | O3              | 109.46(15) |  | C1 <sup>2</sup> | N1   | C2 <sup>2</sup> | 108.7(2) |
| O1 <sup>1</sup> | Tc1  | O3              | 109.46(15) |  | C1              | N1   | C2 <sup>2</sup> | 109.3(2) |
| O2              | Tc1  | O3              | 109.5(2)   |  | C2 <sup>2</sup> | N1   | C2              | 110.4(3) |

<sup>1</sup>+X,+Y,3/2-Z; <sup>2</sup>+X,1/2-Y,1-Z

**Table S3.** Bond Lengths for **2**.

| Atom | Atom            | Length/Å |  | Atom | Atom            | Length/Å |
|------|-----------------|----------|--|------|-----------------|----------|
| Re1  | O1 <sup>1</sup> | 1.665(7) |  | N1   | C1              | 1.475(8) |
| Re1  | O1              | 1.665(7) |  | N1   | C1 <sup>2</sup> | 1.475(8) |

|     |    |          |  |    |                 |          |
|-----|----|----------|--|----|-----------------|----------|
| Re1 | O2 | 1.686(9) |  | N1 | C2 <sup>2</sup> | 1.480(8) |
| Re1 | O3 | 1.714(8) |  | N1 | C2              | 1.480(8) |

<sup>1</sup>+X,+Y,3/2-Z; <sup>2</sup>+X,1/2-Y,1-Z

**Table S4.** Bond Angles for **2**.

| Atom            | Atom | Atom | Angle/°  |  | Atom            | Atom | Atom            | Angle/°  |
|-----------------|------|------|----------|--|-----------------|------|-----------------|----------|
| O1 <sup>1</sup> | Re1  | O1   | 113.2(9) |  | C1              | N1   | C1 <sup>2</sup> | 109.8(8) |
| O1 <sup>1</sup> | Re1  | O2   | 107.5(4) |  | C1 <sup>2</sup> | N1   | C2 <sup>2</sup> | 109.1(5) |
| O1              | Re1  | O2   | 107.5(4) |  | C1              | N1   | C2 <sup>2</sup> | 109.1(5) |
| O1 <sup>1</sup> | Re1  | O3   | 108.9(3) |  | C1              | N1   | C2              | 109.1(5) |
| O1              | Re1  | O3   | 108.9(3) |  | C1 <sup>2</sup> | N1   | C2              | 109.0(5) |
| O2              | Re1  | O3   | 110.7(4) |  | C2              | N1   | C2 <sup>2</sup> | 110.8(8) |

<sup>1</sup>+X,+Y,3/2-Z; <sup>2</sup>+X,1/2-Y,1-Z

**Table S5.** Bond Lengths for **3**.

| Atom | Atom | Length/Å  |  | Atom | Atom | Length/Å  |
|------|------|-----------|--|------|------|-----------|
| Re1  | O1   | 1.633(10) |  | C13  | C14  | 1.371(11) |
| Re1  | O2   | 1.628(11) |  | C21  | C22  | 1.426(10) |
| Re1  | O3   | 1.699(12) |  | C22  | C23  | 1.415(11) |
| Re1  | O4   | 1.644(9)  |  | C23  | C24  | 1.374(11) |
| N1   | C11  | 1.564(16) |  | C31  | C32  | 1.405(10) |
| N1   | C21  | 1.47(2)   |  | C32  | C33  | 1.386(10) |
| N1   | C31  | 1.61(3)   |  | C33  | C34  | 1.372(11) |
| N1   | C41  | 1.473(13) |  | C41  | C42  | 1.366(11) |
| C11  | C12  | 1.353(11) |  | C42  | C43  | 1.370(11) |
| C12  | C13  | 1.361(9)  |  | C43  | C44  | 1.371(12) |

**Table S6.** Bond Angles for **3**.

| Atom | Atom | Atom | Angle/°   |  | Atom | Atom | Atom | Angle/°   |
|------|------|------|-----------|--|------|------|------|-----------|
| O1   | Re1  | O3   | 107.0(10) |  | C12  | C11  | N1   | 123.2(15) |
| O1   | Re1  | O4   | 112.6(6)  |  | C11  | C12  | C13  | 134.9(15) |
| O2   | Re1  | O1   | 112.7(9)  |  | C12  | C13  | C14  | 133.3(14) |
| O2   | Re1  | O3   | 107.3(6)  |  | C22  | C21  | N1   | 117.7(10) |
| O2   | Re1  | O4   | 111.1(9)  |  | C23  | C22  | C21  | 121.0(12) |
| O4   | Re1  | O3   | 105.6(9)  |  | C24  | C23  | C22  | 126.5(16) |
| C11  | N1   | C31  | 104.1(17) |  | C32  | C31  | N1   | 117.8(11) |
| C21  | N1   | C11  | 111.6(10) |  | C33  | C32  | C31  | 126.6(12) |
| C21  | N1   | C31  | 110.3(8)  |  | C34  | C33  | C32  | 129.6(14) |
| C41  | N1   | C11  | 111.3(7)  |  | C42  | C41  | N1   | 131.0(15) |
| C41  | N1   | C21  | 111.5(19) |  | C41  | C42  | C43  | 131.5(17) |

|     |    |     |           |  |     |     |     |           |
|-----|----|-----|-----------|--|-----|-----|-----|-----------|
| C41 | N1 | C31 | 107.8(12) |  | C42 | C43 | C44 | 131.2(18) |
|-----|----|-----|-----------|--|-----|-----|-----|-----------|

**Table S7.** Torsion Angles for **3**.

| A   | B   | C   | D   | Angle/°    |  | A   | B   | C   | D   | Angle/°    |
|-----|-----|-----|-----|------------|--|-----|-----|-----|-----|------------|
| N1  | C11 | C12 | C13 | -162.3(17) |  | C21 | N1  | C41 | C42 | -169.0(15) |
| N1  | C21 | C22 | C23 | 158(3)     |  | C21 | C22 | C23 | C24 | 166(4)     |
| N1  | C31 | C32 | C33 | -164(2)    |  | C31 | N1  | C11 | C12 | -168.6(12) |
| N1  | C41 | C42 | C43 | -172(2)    |  | C31 | N1  | C21 | C22 | 51.0(19)   |
| C11 | N1  | C21 | C22 | 166.1(14)  |  | C31 | N1  | C41 | C42 | 69.8(18)   |
| C11 | N1  | C31 | C32 | -65.6(16)  |  | C31 | C32 | C33 | C34 | 53(4)      |
| C11 | N1  | C41 | C42 | -44(3)     |  | C41 | N1  | C11 | C12 | -53(2)     |
| C11 | C12 | C13 | C14 | -71(3)     |  | C41 | N1  | C21 | C22 | -68.8(17)  |
| C21 | N1  | C11 | C12 | 72.5(16)   |  | C41 | N1  | C31 | C32 | 176.2(14)  |
| C21 | N1  | C31 | C32 | 54.2(18)   |  | C41 | C42 | C43 | C44 | -176(3)    |

**Table S8.** Bond Lengths for **4**.

| Table 4 Bond Lengths for bu4n. |      |          |  |      |      |          |
|--------------------------------|------|----------|--|------|------|----------|
| Atom                           | Atom | Length/Å |  | Atom | Atom | Length/Å |
| Tc1                            | O1   | 1.601(8) |  | C13  | C14  | 1.284(8) |
| Tc1                            | O2   | 1.617(8) |  | C21  | C22  | 1.283(8) |
| Tc1                            | O3   | 1.621(8) |  | C22  | C23  | 1.285(8) |
| Tc1                            | O4   | 1.607(8) |  | C23  | C24  | 1.283(8) |
| N1                             | C11  | 1.497(9) |  | C31  | C32  | 1.287(7) |
| N1                             | C21  | 1.501(9) |  | C32  | C33  | 1.290(7) |
| N1                             | C31  | 1.500(9) |  | C33  | C34  | 1.295(7) |
| N1                             | C41  | 1.490(9) |  | C41  | C42  | 1.285(7) |
| C11                            | C12  | 1.266(7) |  | C42  | C43  | 1.284(7) |
| C12                            | C13  | 1.282(7) |  | C43  | C44  | 1.284(7) |

**Table S9.** Bond Angles for **4**.

| Table 5 Bond Angles for bu4n. |      |      |          |  |      |      |      |           |
|-------------------------------|------|------|----------|--|------|------|------|-----------|
| Atom                          | Atom | Atom | Angle/°  |  | Atom | Atom | Atom | Angle/°   |
| O1                            | Tc1  | O2   | 110.4(6) |  | C12  | C11  | N1   | 149.9(10) |
| O1                            | Tc1  | O3   | 110.0(6) |  | C11  | C12  | C13  | 151.5(14) |
| O1                            | Tc1  | O4   | 111.6(5) |  | C12  | C13  | C14  | 142.8(18) |
| O2                            | Tc1  | O3   | 107.4(5) |  | C22  | C21  | N1   | 107.6(13) |
| O4                            | Tc1  | O2   | 109.0(6) |  | C23  | C22  | C21  | 143(2)    |
| O4                            | Tc1  | O3   | 108.3(6) |  | C24  | C23  | C22  | 143(2)    |
| C11                           | N1   | C21  | 108.5(6) |  | C32  | C31  | N1   | 128.8(12) |
| C11                           | N1   | C31  | 107.5(6) |  | C31  | C32  | C33  | 141.7(14) |
| C31                           | N1   | C21  | 108.7(6) |  | C32  | C33  | C34  | 138.6(14) |

|     |    |     |          |  |     |     |     |           |
|-----|----|-----|----------|--|-----|-----|-----|-----------|
| C41 | N1 | C11 | 111.0(5) |  | C42 | C41 | N1  | 133.0(12) |
| C41 | N1 | C21 | 110.5(6) |  | C43 | C42 | C41 | 146.8(16) |
| C41 | N1 | C31 | 110.5(6) |  | C42 | C43 | C44 | 145.3(17) |

**Table S10.** Torsion Angles for **4**.

| <b>Table 6 Torsion Angles for bu4n.</b> |          |          |          |                |  |          |          |          |          |                |
|-----------------------------------------|----------|----------|----------|----------------|--|----------|----------|----------|----------|----------------|
| <b>A</b>                                | <b>B</b> | <b>C</b> | <b>D</b> | <b>Angle/°</b> |  | <b>A</b> | <b>B</b> | <b>C</b> | <b>D</b> | <b>Angle/°</b> |
| N1                                      | C11      | C12      | C13      | -105(4)        |  | C21      | N1       | C41      | C42      | -161.7(14)     |
| N1                                      | C21      | C22      | C23      | 155(4)         |  | C21      | C22      | C23      | C24      | 76(11)         |
| N1                                      | C31      | C32      | C33      | -166(3)        |  | C31      | N1       | C11      | C12      | -153(2)        |
| N1                                      | C41      | C42      | C43      | -138(4)        |  | C31      | N1       | C21      | C22      | 60.2(19)       |
| C11                                     | N1       | C21      | C22      | 176.8(18)      |  | C31      | N1       | C41      | C42      | 77.9(16)       |
| C11                                     | N1       | C31      | C32      | -71(2)         |  | C31      | C32      | C33      | C34      | 49(6)          |
| C11                                     | N1       | C41      | C42      | -41.3(16)      |  | C41      | N1       | C11      | C12      | -32(2)         |
| C11                                     | C12      | C13      | C14      | -162(5)        |  | C41      | N1       | C21      | C22      | -61.3(19)      |
| C21                                     | N1       | C11      | C12      | 89(2)          |  | C41      | N1       | C31      | C32      | 168(2)         |
| C21                                     | N1       | C31      | C32      | 46(2)          |  | C41      | C42      | C43      | C44      | -135(5)        |
